# Supplementary material
Source: publisher figshare collection journal article supplement (https://sage.figshare.com/ndownloader/files/13569149)
Supplement: Supplementary file 1 [file 13569149]

## Appendix A

### References Studies Included in the Multilevel Meta-analysis Demonstration Investigating the Influence of Peer-Tutoring on Social Outcomes

1. Banda, D. R., Hart, S. L., & Liu-Gitz, L. (2010). Impact of training peers and children with autism on social skills during center time activities in inclusive classrooms. *Research in Autism Spectrum Disorders*, 4(4), 619-625.
2. Barton-Arwood, S. M. (2003). *Reading instruction for elementary-age students with emotional and behavioral disorders: Academic and behavioral outcomes* (Doctoral dissertation). Retrieved from ProQuest Dissertations and Theses database. (UMI No. 3085747)
3. Christensen, L., Young, K. R., & Marchant, M. (2007). Behavioral intervention planning: Increasing appropriate behavior of a socially withdrawn student. *Education and Treatment of Children*, 30(4), 81-103.
4. Gillies, A. (2012). *A Multi-Perspective Exploration of a Cross-Age Tutoring Initiative: An Analysis of the Responses of All Students*. (Doctoral dissertations). Retrieved from <http://scholarcommons.usf.edu/etd/4324>
5. Goldstein, H., & Ferrell, D. R. (1987). Augmenting communicative interaction between handicapped and nonhandicapped preschool children. *Journal of Speech and Hearing Disorders*, 52(3), 200-211.
6. Harper, C. B., Symon, J. B., & Frea, W. D. (2008). Recess is time-in: Using peers to improve social skills of children with autism. *Journal of Autism and Developmental Disorders*, 38(5), 815-826. doi: 10.1007/s10803-007-0449-2
7. Hibbert, D., Kostinas, G., & Luiselli, J. K. (2002). Improving skills performance of an adult with mental retardation through peer-mediated instructional support. *Journal of Developmental and Physical Disabilities*, 14(2), 119-127.
8. Kamps, D. M., Barbetta, P. M., Leonard, B. R., & Delquadri, J. (1994). Classwide peer tutoring: An integration strategy to improve reading skills and promote peer interactions among students with autism and general education peers. *Journal of applied behavior analysis*, 27(1), 49-61.
9. Kohl, F. L., & Stettner-Eaton, B. A. (1985). Fourth graders as trainers of cafeteria skills to severely handicapped students. *Education and Training of the Mentally Retarded*, 60-68.
10. Labbe-Poisson, K. A. (2009). *Peer-mediated social skills instruction and self-management strategies for students with autism* (Doctoral dissertation). Retrieved from ProQuest Dissertations and Theses database. (UMI No. 3390969)
11. Lacava, P. G., Rankin, A., Mahlios, E., Cook, K., & Simpson, R. L. (2010). A single case design evaluation of a software and tutor intervention addressing emotion recognition and social interaction in four boys with ASD. *Autism*, 14(3), 161-178. doi: 10.1177/1362361310362085
12. Laushey, K. M., & Heflin, L. J. (2000). Enhancing social skills of kindergarten children with autism through the training of multiple peers as tutors. *Journal of autism and developmental disorders*, 30(3), 183-193.

13. Locke, W. R., & Fuchs, L. S. (1995). Effects of peer-mediated reading instruction on the on-task behavior and social interaction of children with behavior disorders. *Journal of Emotional and Behavioral Disorders*, 3(2), 92-99.
14. Loftin, R. L., Odom, S. L., & Lantz, J. F. (2008). Social interaction and repetitive motor behaviors. *Journal of Autism and Developmental Disorders*, 38(6), 1124-1135. doi: 10.1007/s10803-007-0499-5
15. Lorah, E. R., Gilroy, S. P., & Hineline, P. N. (2014). Acquisition of peer manding and listener responding in young children with autism. *Research in Autism Spectrum Disorders*, 8(2), 61-67.
16. Lorah, K. S. (2002). *Effects of peer tutoring on the reading performance and classroom behavior of students with Attention Deficit Hyperactivity Disorder* (Doctoral dissertation). Retrieved from ProQuest Dissertations and Theses database. (UMI No. 3086957)
17. Mason, R., Kamps, D., Turcotte, A., Cox, S., Feldmiller, S., & Miller, T. (2014). Peer mediation to increase communication and interaction at recess for students with autism spectrum disorders. *Research in autism spectrum disorders*, 8(3), 334-344.
18. O'Reilly, M. F., & Glynn, D. (1995). Using a process social skills training approach with adolescents with mild intellectual disabilities in a high school setting. *Education and Training in Mental Retardation and Developmental Disabilities*, 187-198.
19. Petursdottir, A. L., McComas, J., McMaster, K., & Horner, K. (2007). The effects of scripted peer tutoring and programming common stimuli on social interactions of a student with autism spectrum disorder. *Journal of Applied Behavior Analysis*, 40(2), 353-357.
20. Plumer, P. J. (2007). *Using peers as intervention agents to improve the social behaviors of elementary-aged children with attention deficit hyperactivity disorder: Effects of a peer coaching package* (Doctoral dissertation). Retrieved from ProQuest Dissertations and Theses database. (UMI No. 3275754)
21. Plumer, P. J., & Stoner, G. (2005). The relative effects of classwide peer tutoring and peer coaching on the positive social behaviors of children with ADHD. *Journal of Attention Disorders*, 9(1), 290-300.
22. Scott, K. L. (2013). *Exploring personal connections to texts and peers using cooperative peers tutoring groups in English language arts instruction with students with autism* (Doctoral dissertation). Retrieved from ProQuest Dissertations and Theses database. (UMI No. 3574633)
23. Strasberger, S. K., & Ferreri, S. J. (2014). The effects of peer assisted communication application training on the communicative and social behaviors of children with autism. *Journal of Developmental and Physical Disabilities*, 26(5), 513-526. doi: 10.1007/s10882-013-9358-9
24. Taylor, B. A., Hoch, H., Potter, B., Rodriguez, A., Spinnato, D., & Kalaigian, M. (2005). Manipulating establishing operations to promote initiations toward peers in children with autism. *Research in Developmental Disabilities*, 26(4), 385-392. doi: 10.1016/j.ridd.2004.11.003

25. Trembath, D., Balandin, S., Togher, L., & Stancliffe, R. J. (2009). Peer-mediated teaching and augmentative and alternative communication for preschool-aged children with autism. *Journal of Intellectual and Developmental Disability, 34*(2), 173-186.
26. Vilardo, B. A., DuPaul, G. J., Kern, L., & Hojnoski, R. L. (2013). Cross-age peer coaching: Enhancing the peer interactions of children exhibiting symptoms of ADHD. *Child & Family Behavior Therapy, 35*(1), 63-81. doi: 10.1080/07317107.2013.761043
27. Xu, Y., Gelfer, J. I., Sileo, N., Filler, J., & Perkins, P. G. (2008). Effects of peer tutoring on young children's social interactions. *Early Child Development and Care, 178*(6), 617-635.
